# Supplementary figures and images for: Unregulated GmAGL82 due to Phosphorus Deficiency Positively Regulates Root Nodule Growth in Soybean
Source: MDPI journal article supplement (doi:10.3390/ijms25031802), 2024-02-01

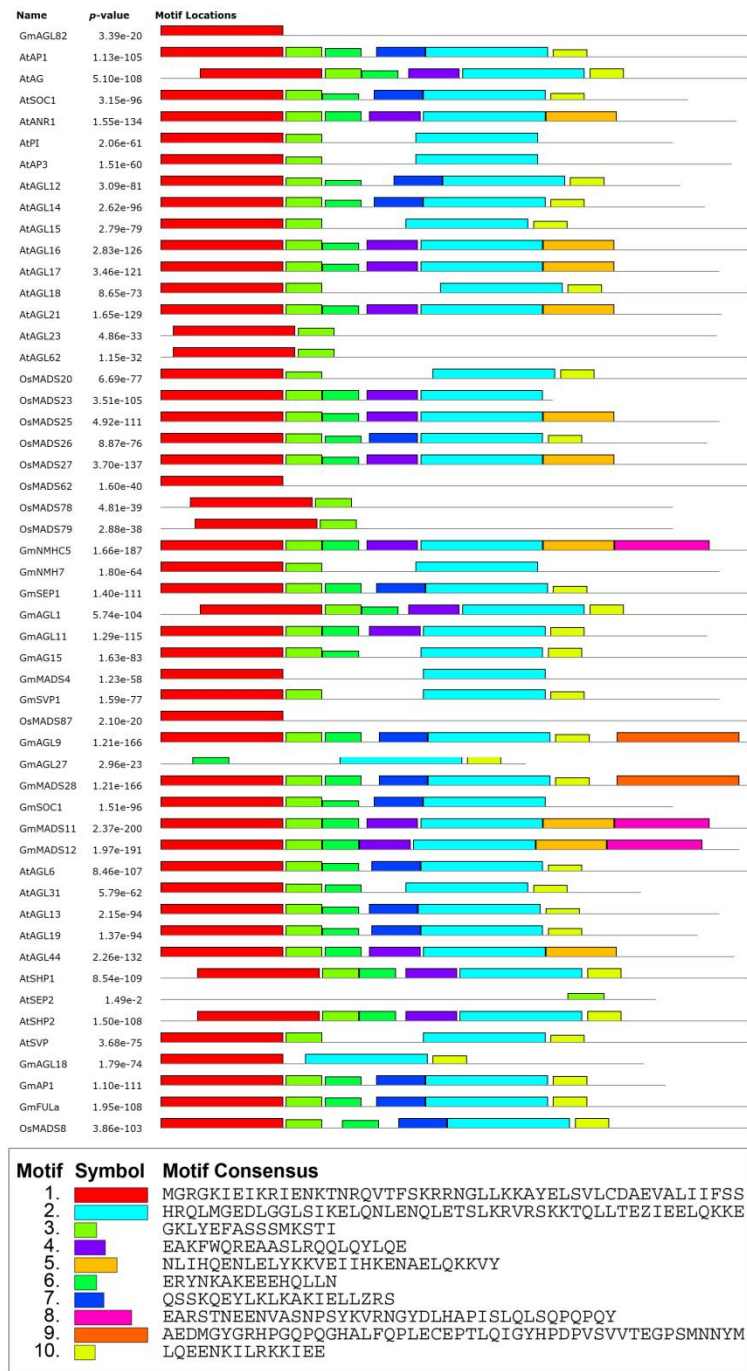

**Figure S1.** Conserved motif analysis of plant MADS proteins.

Supplement: s1 [file s1]
